# Supplementary material for: Rapid-DEM: Rapid Topographic Updates through Satellite Change Detection and UAS Data Fusion
Source: MDPI journal article supplement (doi:10.3390/rs14071718), 2022-04-02

# ODM Quality Report

Processed with ODM version 2.8.0

## Dataset Summary

|                 |                        |
|-----------------|------------------------|
| Date            | 16/02/2022 at 20:38:49 |
| Area Covered    | 0.626032 km²           |
| Processing Time | 2.0h:15.0m:31.0s       |
| Capture Start   | 23/11/2021 at 12:58:24 |
| Capture End     | 23/11/2021 at 13:15:17 |

## Processing Summary

|                                        |                                   |
|----------------------------------------|-----------------------------------|
| Reconstructed Images                   | 326 over 339 shots (96.2%)        |
| Reconstructed Points (Sparse)          | 596830 over 632905 points (94.3%) |
| Reconstructed Points (Dense)           | 3,779,028 points                  |
| Average Ground Sampling Distance (GSD) | 6.2 cm                            |
| Detected Features                      | 25,994 features                   |
| Reconstructed Features                 | 5,575 features                    |
| Geographic Reference                   | GPS                               |
| GPS errors                             | 7.16 meters                       |

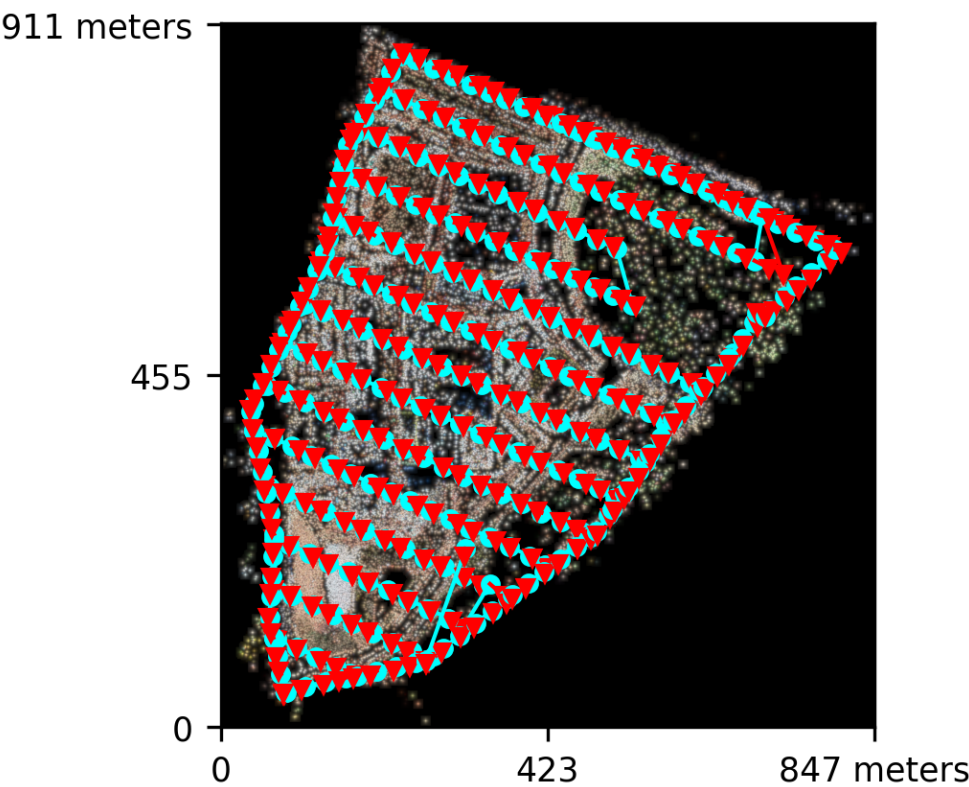

Previews

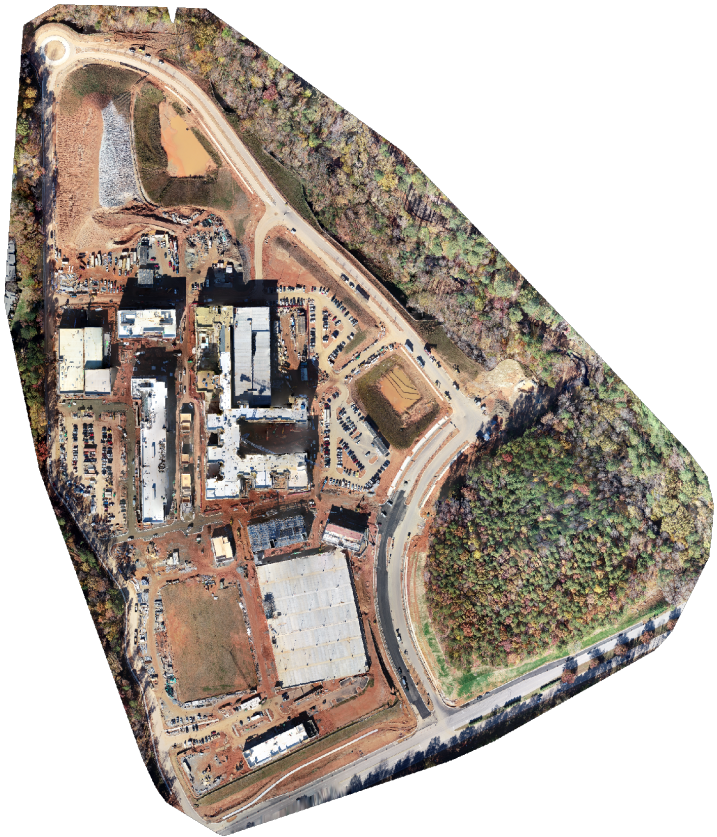

Orthophoto

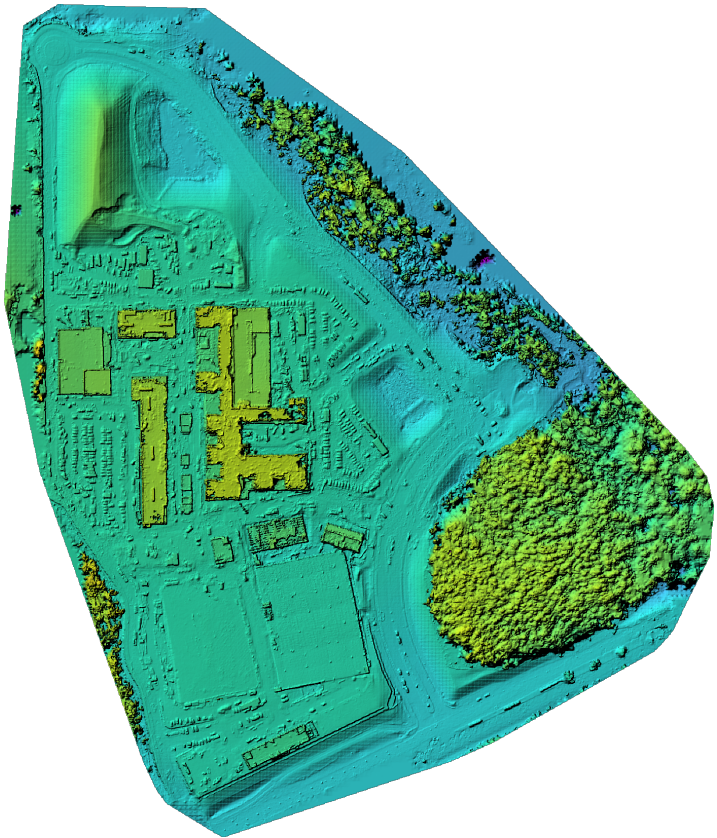

Digital Surface Model

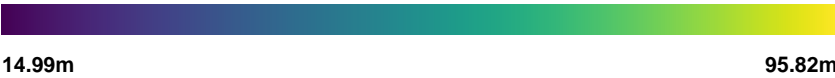

14.99m

95.82m

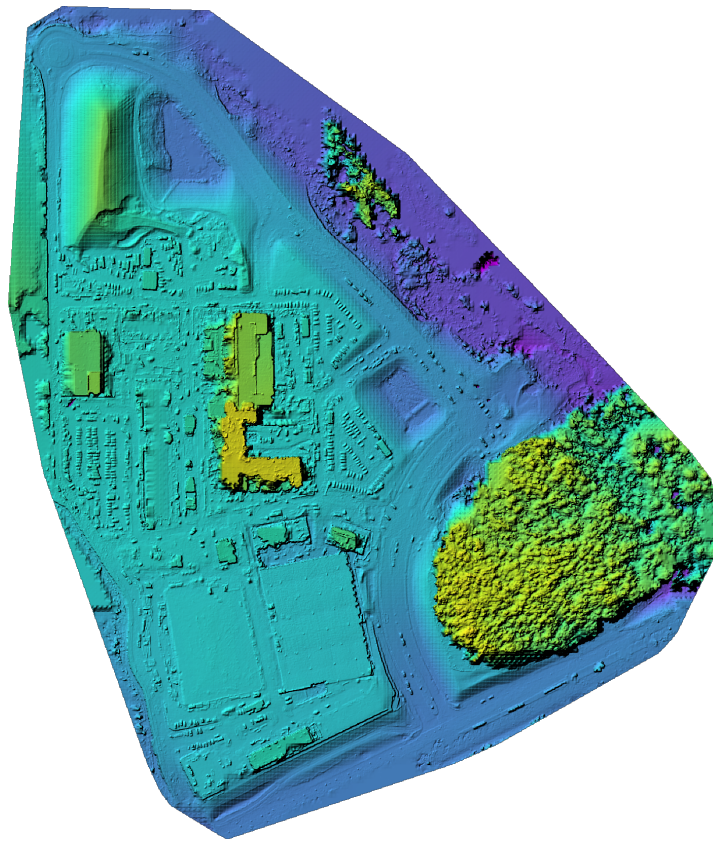

Digital Terrain Model

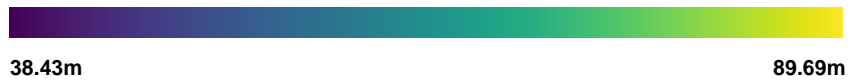

38.43m

89.69m

# Survey Data

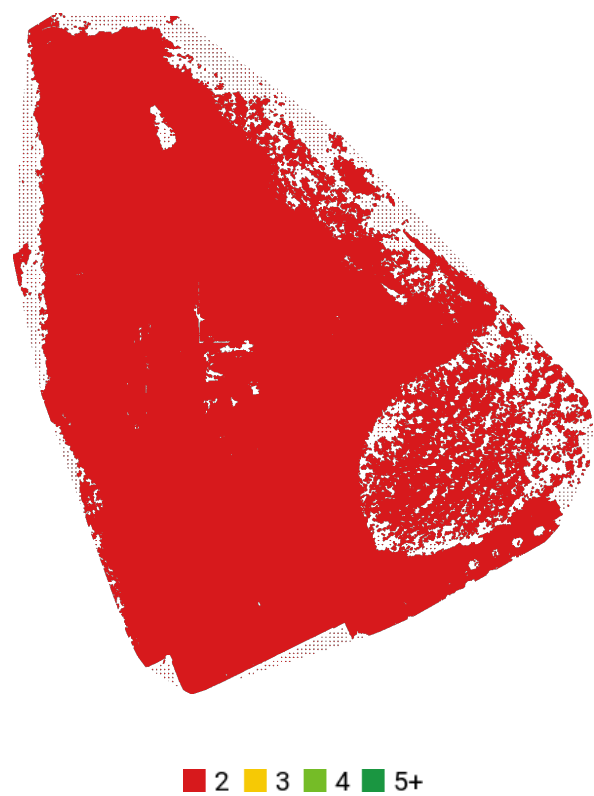

## GPS/GCP/3D Errors Details

| GPS              | Mean   | Sigma  | RMS Error |
|------------------|--------|--------|-----------|
| X Error (meters) | -3.192 | 10.425 | 10.903    |
| Y Error (meters) | -1.617 | 7.095  | 7.277     |
| Z Error (meters) | 0.560  | 4.421  | 4.456     |
| Total            |        |        | 7.157     |

| 3D               | Mean  | Sigma | RMS Error |
|------------------|-------|-------|-----------|
| X Error (meters) | 0.027 | 0.092 | 0.096     |
| Y Error (meters) | 0.034 | 0.098 | 0.104     |
| Z Error (meters) | 0.040 | 0.090 | 0.099     |
| Total            |       |       | 0.068     |

|                                   | Absolute | Relative |
|-----------------------------------|----------|----------|
| Horizontal Accuracy CE90 (meters) | 10.696   | 0.095    |
| Vertical Accuracy LE90 (meters)   | 2.038    | 0.090    |



# Features Details

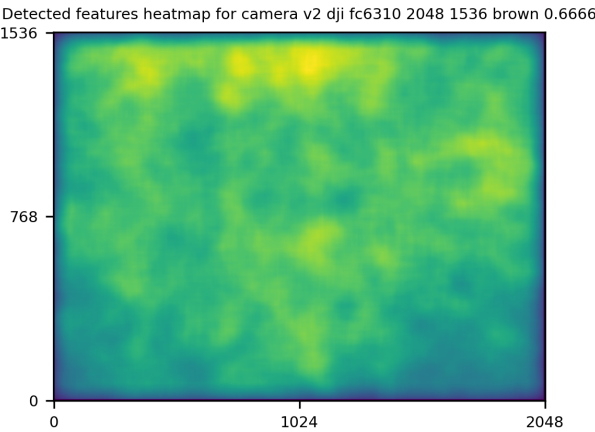

|               | Min.  | Max.  | Mean  | Median |
|---------------|-------|-------|-------|--------|
| Detected      | 10025 | 71818 | 29060 | 25994  |
| Reconstructed | 12    | 21323 | 5600  | 5575   |

# Reconstruction Details

|                                                            |                       |
|------------------------------------------------------------|-----------------------|
| Average Reprojection Error (normalized / pixels / angular) | 0.07 / 0.21 / 0.00012 |
| Average Track Length                                       | 3.06 images           |
| Average Track Length (> 2)                                 | 4.34 images           |

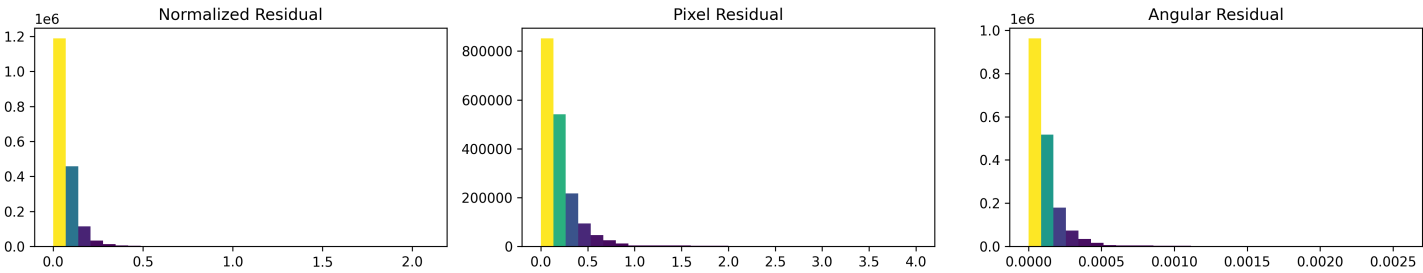

Tracks Details

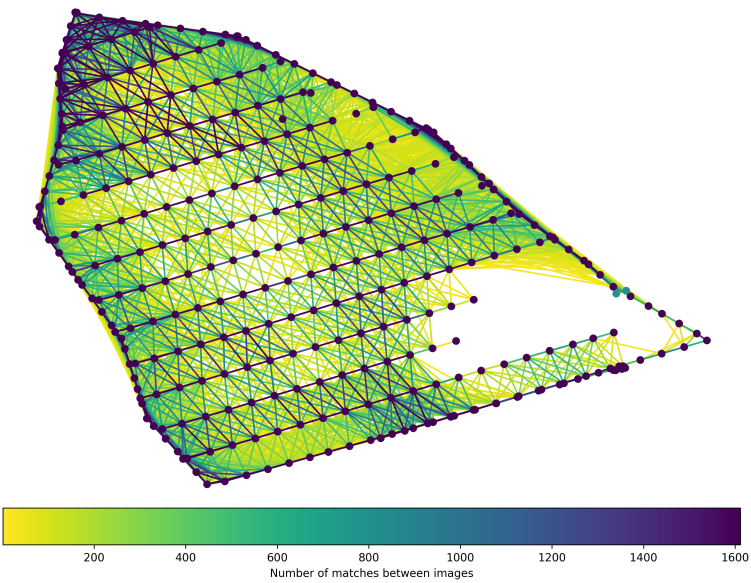

|        |        |        |       |       |       |       |      |      |      |
|--------|--------|--------|-------|-------|-------|-------|------|------|------|
| Length | 2      | 3      | 4     | 5     | 6     | 7     | 8    | 9    | 10   |
| Count  | 326185 | 124689 | 59633 | 34693 | 21706 | 11963 | 6869 | 4193 | 2640 |

Camera Models Details

v2 dji fc6310 2048 1536 brown 0.6666

|           |        |         |        |        |        |        |              |        |        |
|-----------|--------|---------|--------|--------|--------|--------|--------------|--------|--------|
|           | k1     | k2      | k3     | p1     | p2     | focal  | aspect_ratio | cx     | cy     |
| Initial   | 0.0000 | 0.0000  | 0.0000 | 0.0000 | 0.0000 | 0.6667 | 1.0000       | 0.0000 | 0.0000 |
| Optimized | 0.0025 | -0.0168 | 0.0175 | 0.0011 | 0.0023 | 0.7524 | 1.0000       | 0.0045 | 0.0014 |

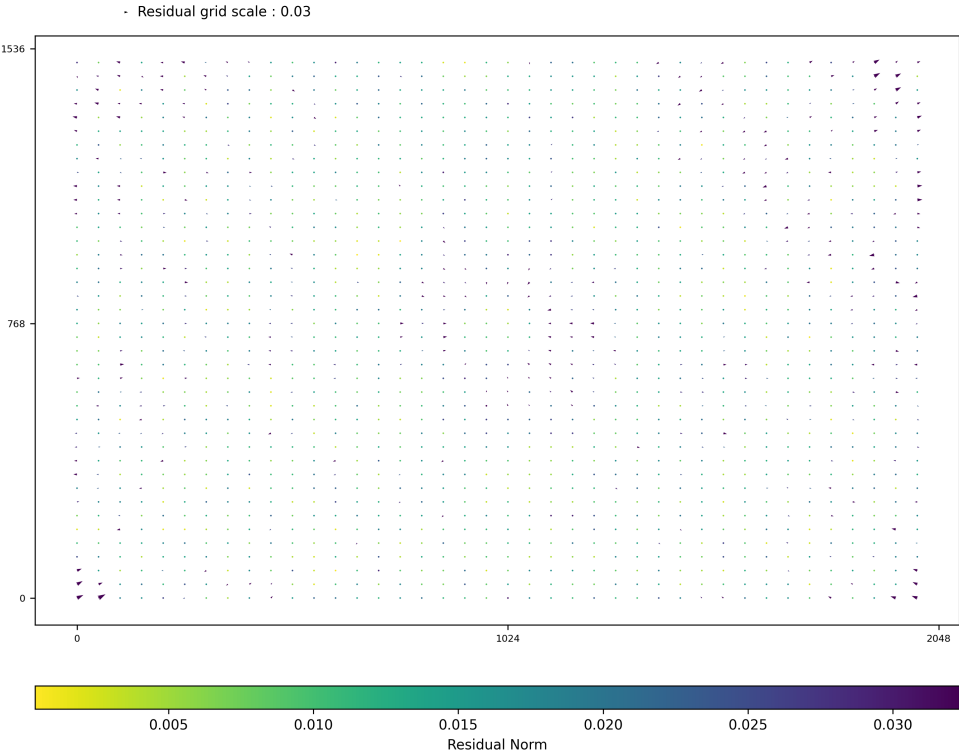

Supplement: s1 [file s1]
